# Supplementary material for: Poly(ethylene glycol)–poly(propylene glycol)–poly(ethylene glycol) and polyvinylidene fluoride blend doped with oxydianiline-based thiourea derivatives as a novel and modest gel electrolyte system for dye-sensitized solar cell applications
Source: Royal Society of Chemistry journal article supplement (doi:10.1039/d0ra01031f), 2020-01-01
Supplement: d0ra01031f1.pdf [file d0ra01031f1.pdf]

# **Poly(Ethylene Glycol)-Poly(Propylene Glycol)-Poly(Ethylene Glycol) and Polyvinylidene Fluoride Blend Doped with the Oxydianiline Based Thiourea Derivatives as a Novel and Modest Gel Electrolyte System for Dye-Sensitized Solar Cell Applications**

**P. Karthika<sup>a</sup>, S. Ganesan<sup>a,\*</sup>**

<sup>a</sup>Organic Synthesis and Energy Conversion Laboratory, Department of Chemistry, Faculty of Engineering and Technology, SRM Institute of Science and Technology, Kattankulathur 603 203, Tamil Nadu, India.

# 1. Synthesis of organic additives:

## 1.1. Synthesis of OPMT

4-Methoxyphenyl isothiocyanate (2.2 mmol) with 4,4'-oxydianiline (1 mmol) was stirred in anhydrous methanol at room temperature for 2-3 days. The product obtained was white precipitate. It was then filtered, washed with methanol and dried under vacuum to obtain **1,1'-(oxybis(4,1-phenylene))bis(3-(4-methoxyphenyl)thiourea)** (OPMT) as white solid with 78% yield. The relevant scheme is given in the Figure S1.  $^1\text{H}$  NMR (400 MHz, DMSO  $d_6$ )  $\delta$  9.62 (s, 2H), 9.58 (s, 2H), 7.46 (d,  $J = 8.8$  Hz, 4H), 7.33 (d,  $J = 8.8$  Hz, 4H), 6.99 (d,  $J = 8.8$  Hz, 4H), 6.92 (d,  $J = 8.8$  Hz, 4H), 3.75 (s, 6H);  $^{13}\text{C}$  NMR (100 MHz, DMSO  $d_6$ )  $\delta$  180.56, 157.07, 154.06, 135.37, 132.61, 126.63, 126.43, 118.90, 114.15, 55.71. HRMS (ESI): calcd. For  $\text{C}_{28}\text{H}_{26}\text{N}_4\text{O}_3\text{S}_2$   $[\text{M}+\text{H}]^+$  530.1446 found to be 531.1519.

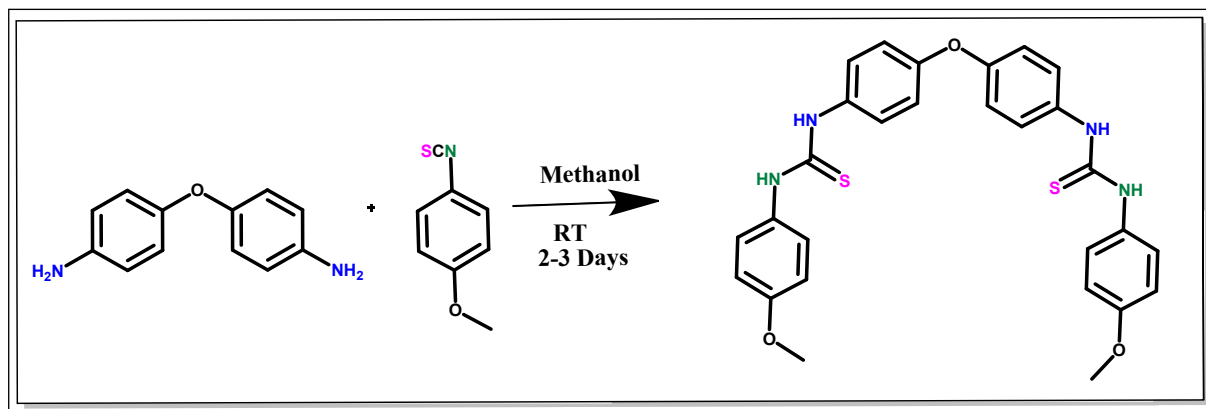

Figure S1. Scheme for the synthesis of organic additive-1 (OPMT)

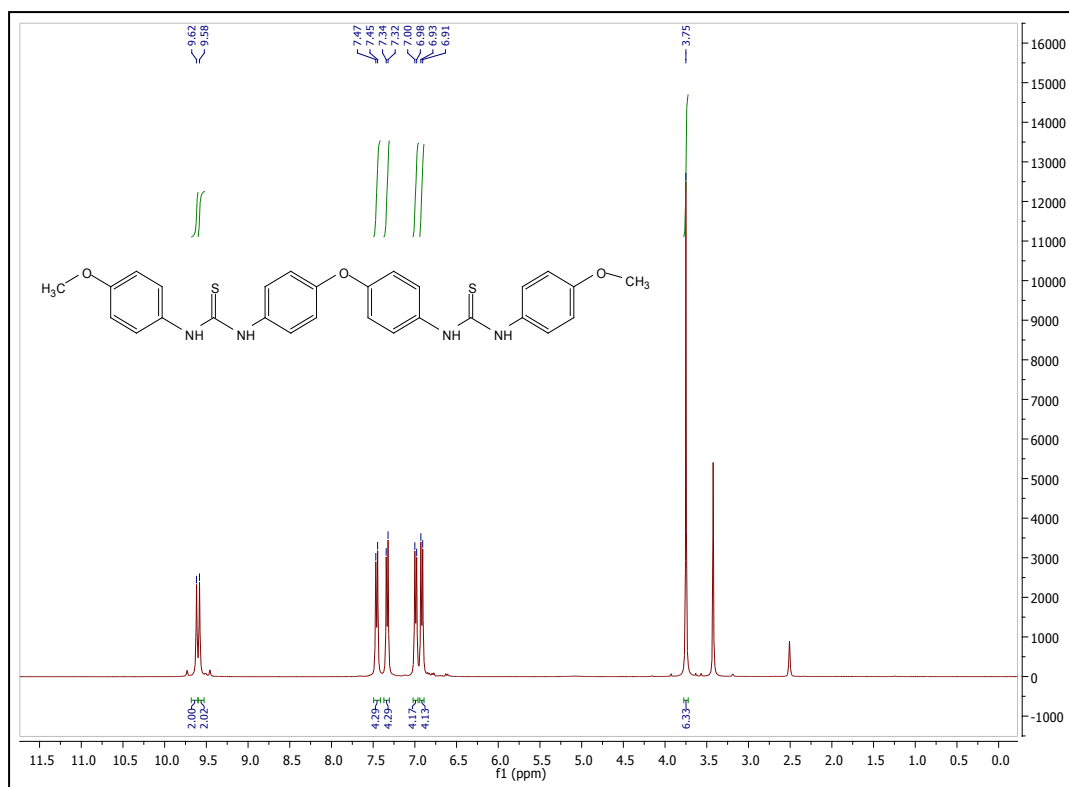

Figure S2.  $^1\text{H}$  NMR spectrum of OPMT

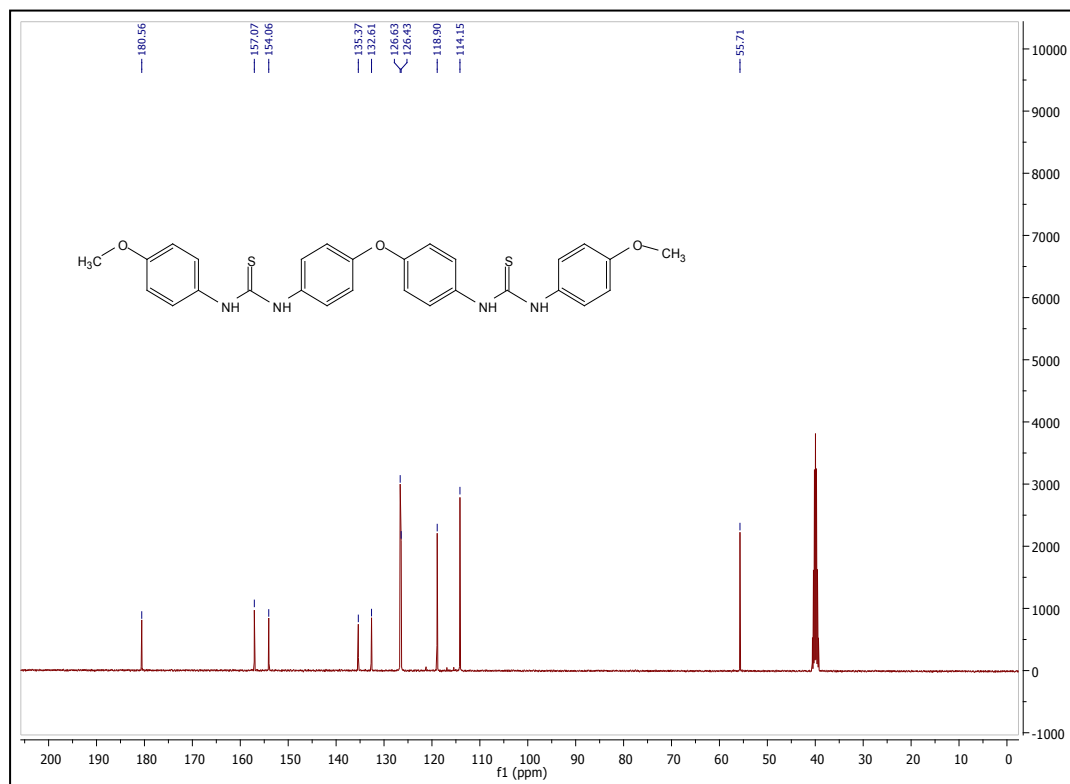

Figure S3.  $^{13}\text{C}$  NMR spectrum of OPMT

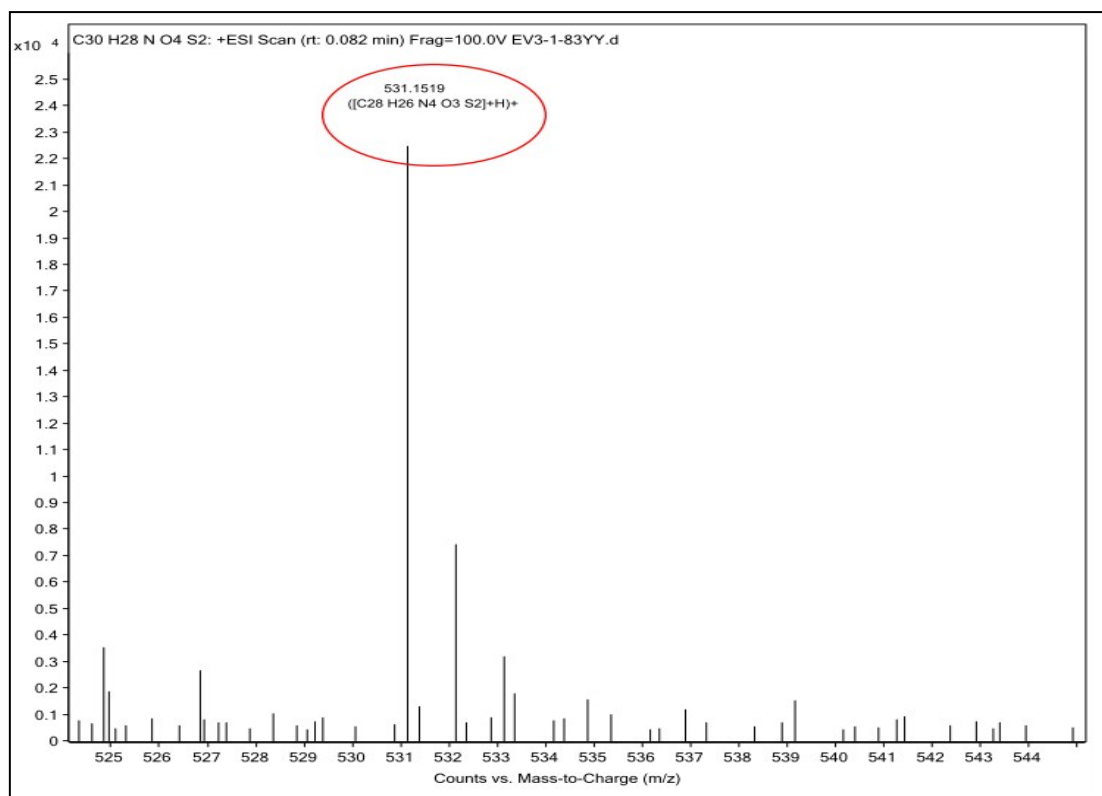

**Figure S4. HRMS spectrum of OPMT**

## 1.2. Synthesis of OPBT

4-n-Butylphenyl isothiocyanate (2.2 mmol) with 4,4'-oxydianiline (1 mmol) was stirred in anhydrous methanol at room temperature for 2-3 days. The product obtained was white precipitate which was then filtered, washed with methanol and dried under vacuum to obtain **1,1'-(oxybis(4,1-phenylene))bis(3-(4-butylphenyl)thiourea)(OPBT)** as a white solid with 75% yield. The relevant scheme is given in the Figure S5.  $^1\text{H}$  NMR (400 MHz, DMSO  $d_6$ )  $\delta$  9.72 (s, 2H), 9.70 (s, 2H), 7.48 (d,  $J = 8.6$  Hz, 4H), 7.38 (d,  $J = 8.1$  Hz, 4H), 7.15 (d,  $J = 8.1$  Hz, 4H), 6.99 (d,  $J = 8.6$  Hz, 4H), 2.55 (m, 4H), 1.57 – 1.43 (m, 4H), 1.32 (m, 4H), 0.91 (t,  $J = 7.3$  Hz, 6H),  $^{13}\text{C}$  NMR (100MHz, DMSO  $d_6$ )  $\delta$  180.19, 154.02, 139.10, 137.47, 135.36, 128.71, 126.29, 124.31, 118.88, 34.81, 33.67, 22.24, 14.28; HRMS (ESI): calcd. For  $\text{C}_{34}\text{H}_{38}\text{N}_4\text{O}_2$   $[\text{M}+\text{H}]^+$  582.2487 found to be 583.2560.

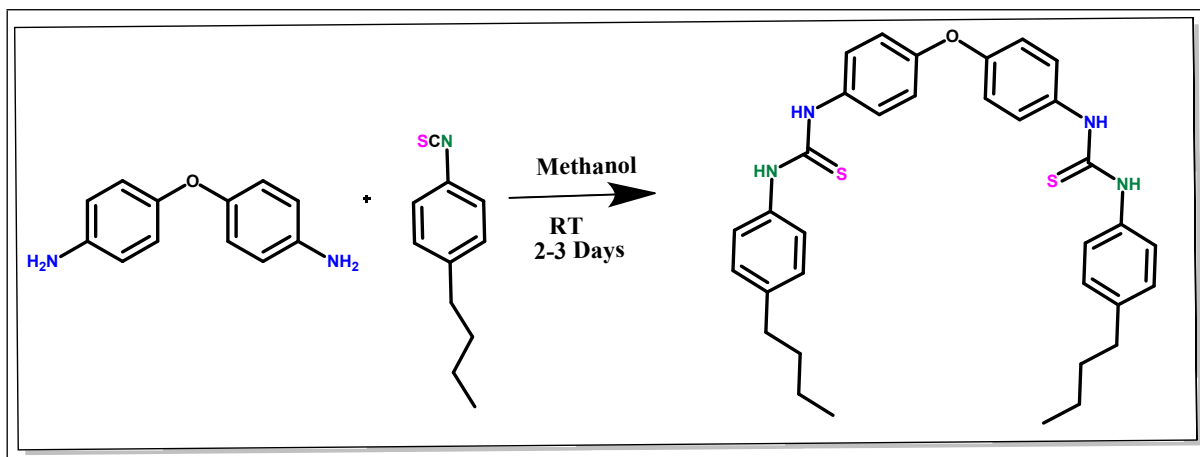

Figure S5. Scheme for the synthesis of organic additive-2 (OPBT)

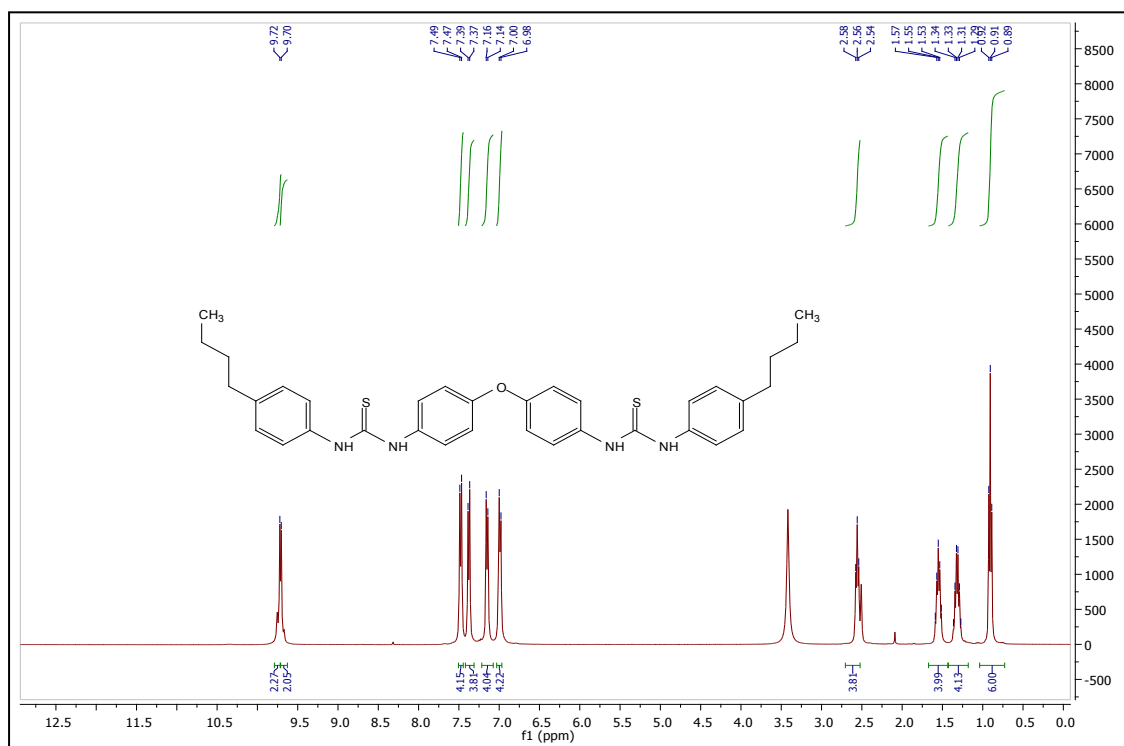

Figure S6. <sup>1</sup>H NMR spectrum of OPBT

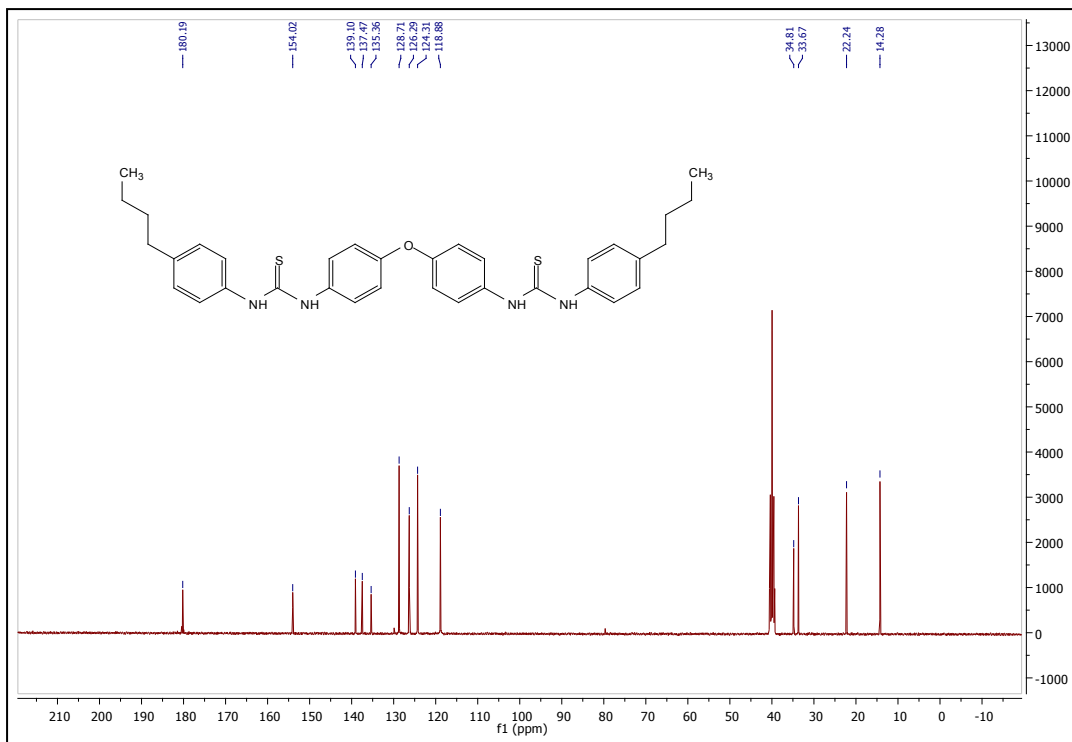

Figure S7. <sup>13</sup>C NMR spectrum of OPBT

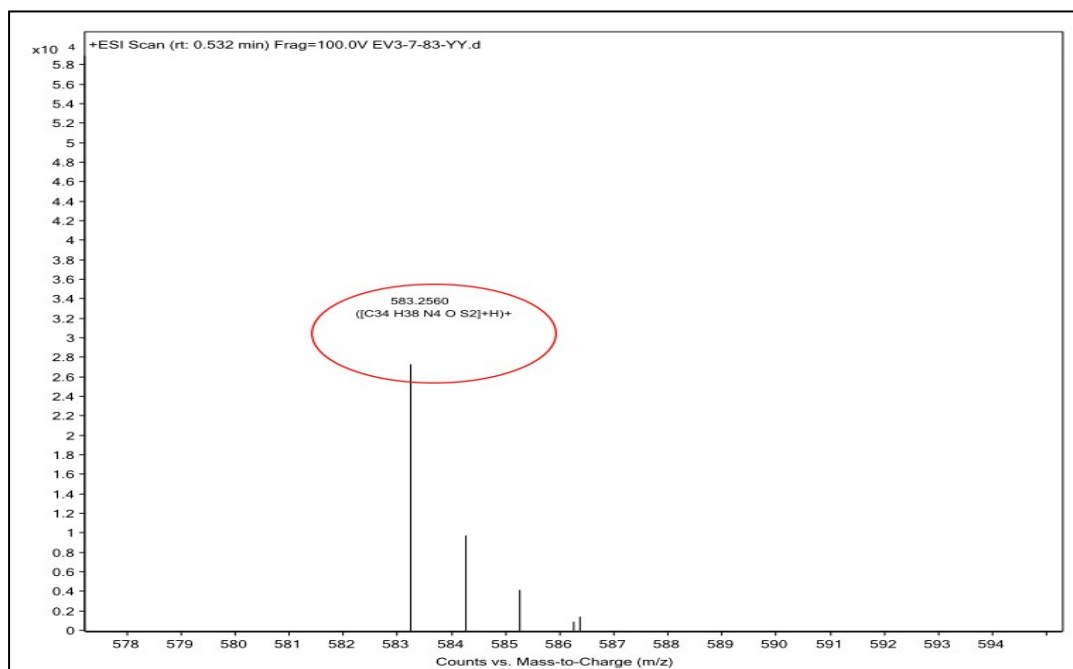

Figure S8. HRMS spectrum of OPBT

### 1.3. Synthesis of OPNT

1-Naphthyl isothiocyanate (2.2 mmol) with 4,4'-oxydianiline (1 mmol) was stirred in anhydrous methanol at room temperature for 2-3 days to obtain the product as white precipitate. It was then filtered, washed with methanol and dried under vacuum to obtain **1,1'-(oxybis(4,1-phenylene))bis(3-(naphthalen-1-yl)thiourea)(OPNT)** as white solid with 70% yield. The relevant scheme is given in the Figure S9.  $^1\text{H}$  NMR (400 MHz, DMSO  $d_6$ )  $\delta$  9.88 (s, 2H), 9.77 (s, 2H), 8.05 – 7.99 (m, 2H), 7.98 (d,  $J = 7.9$  Hz, 2H), 7.88 (d,  $J = 7.3$  Hz, 2H), 7.62 (d,  $J = 9.8$  Hz, 2H), 7.58-7.54 (m, 6H), 7.53-7.48 (m, 4H), 7.02 (t,  $J = 7.3$  Hz, 4H);  $^{13}\text{C}$  NMR (100 MHz, DMSO  $d_6$ )  $\delta$  181.97, 154.26, 135.61, 134.42, 130.49, 128.63, 127.28, 126.88, 126.70, 126.62, 126.55, 126.17, 125.93, 123.63, 118.91; HRMS (ESI): calcd. For  $\text{C}_{34}\text{H}_{26}\text{N}_4\text{OS}_2[\text{M}+\text{H}]^+$  570.1548 found to be 571.1621.

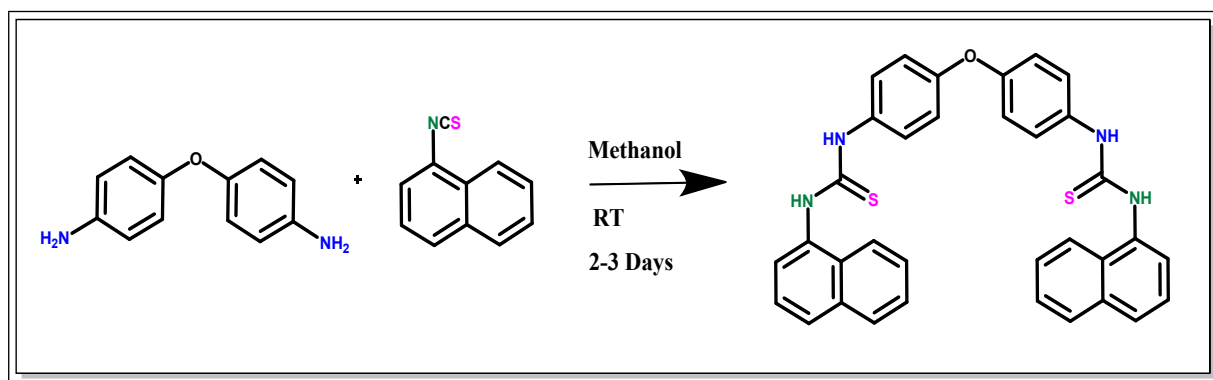

Figure S9. Scheme for the synthesis of organic additive-3 (OPNT)

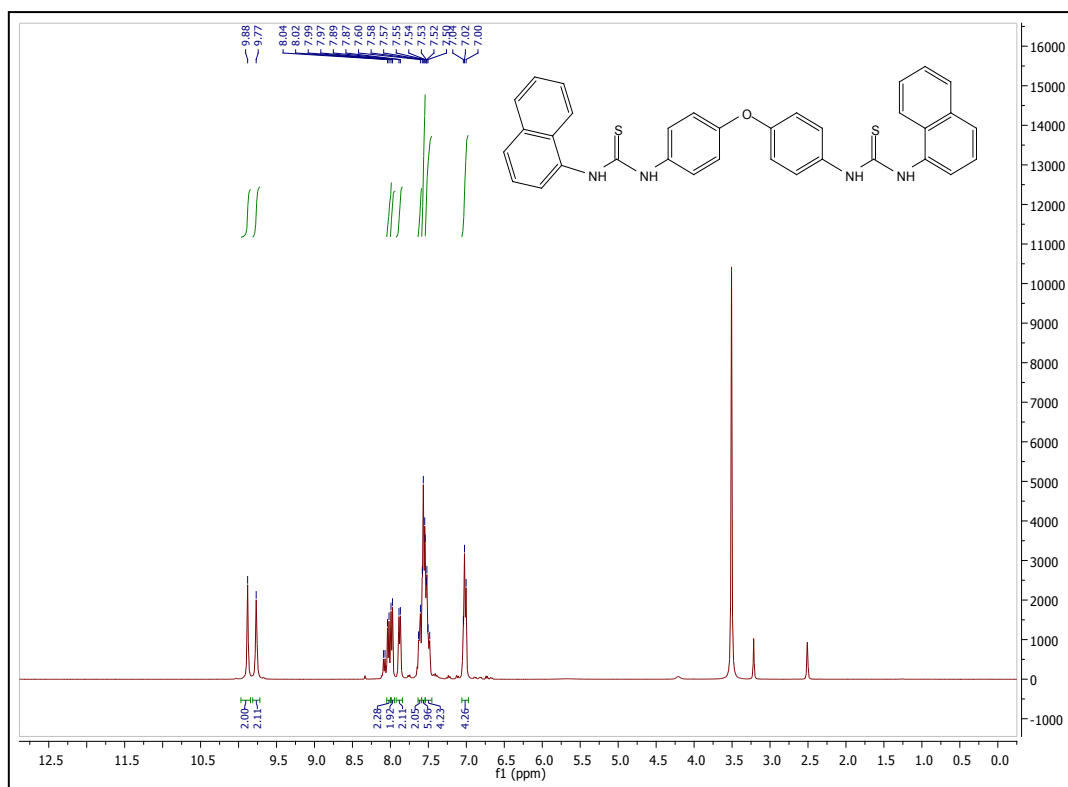

Figure S10.  $^1\text{H}$  NMR spectrum of OPNT

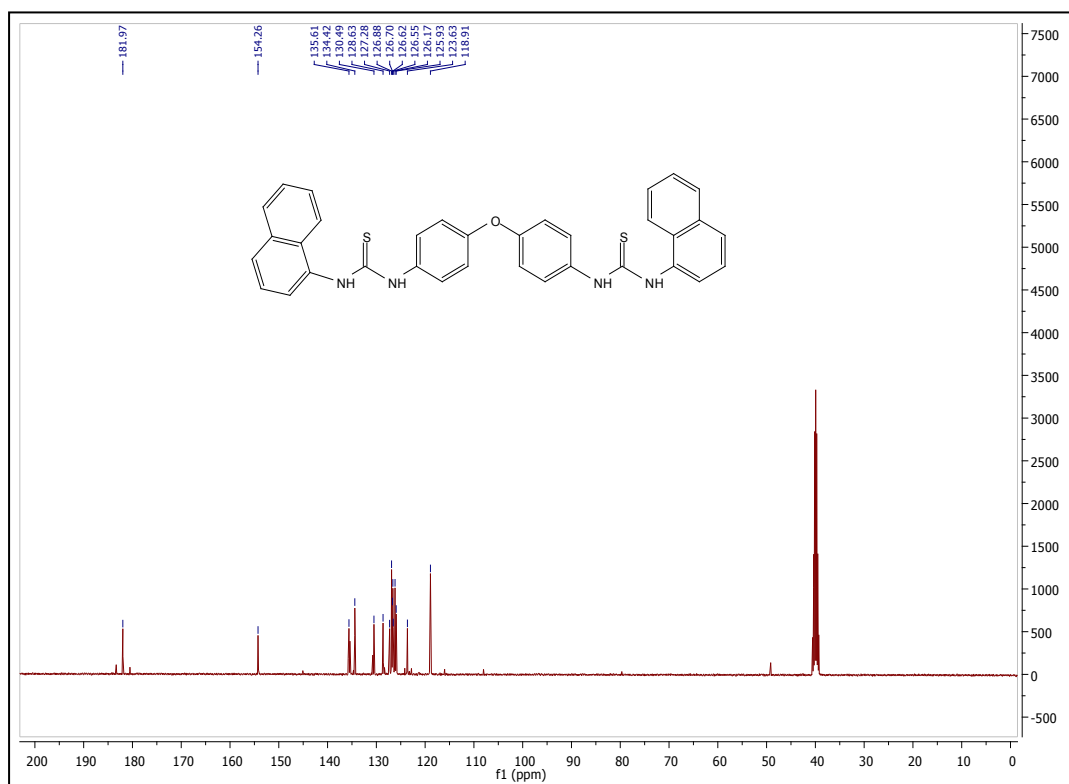

Figure S11.  $^{13}\text{C}$  NMR spectrum of OPNT



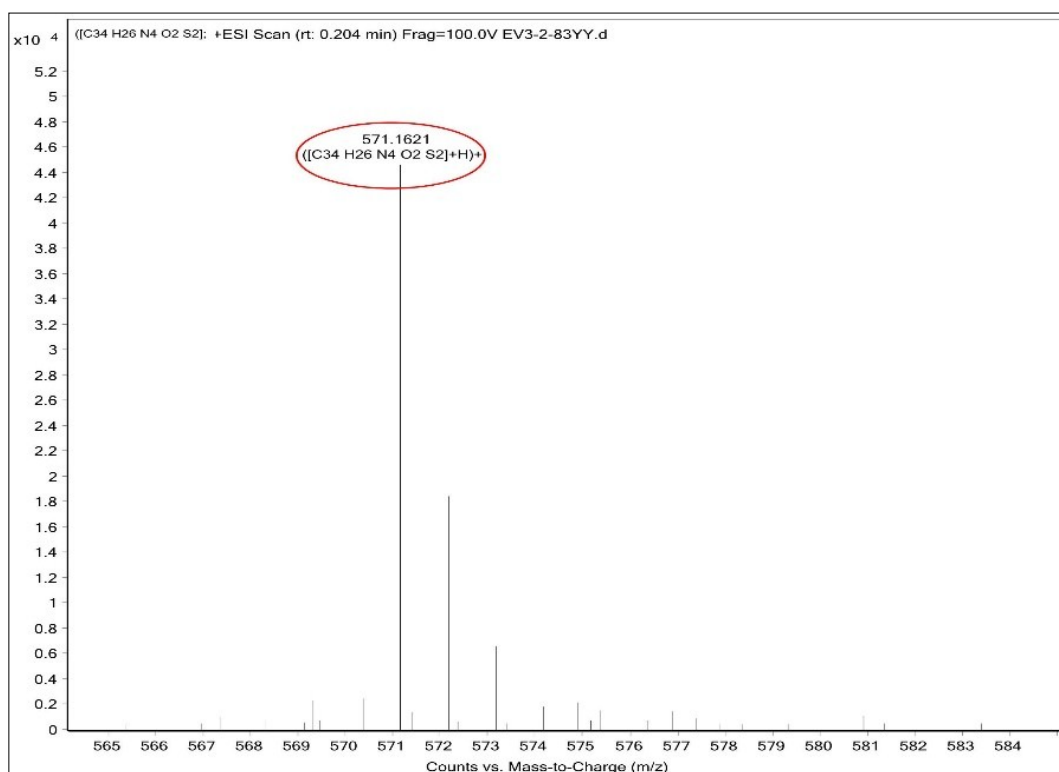

**Figure S12. HRMS spectrum of OPNT**

#### 1.4. Synthesis of OPPT

2-isothiocyanato-6-methylpyridine was synthesized by already reported procedure.<sup>48</sup> 2-isothiocyanato-6-methylpyridine (2.2 mmol) with 4,4'-oxydianiline (1 mmol) was stirred in anhydrous methanol at room temperature for 2-3 days to obtain the product as white precipitate. It was then filtered, washed with methanol and dried under vacuum to obtain **1,1'-(oxybis(4,1-phenylene))bis(3-(6-methylpyridin-2-yl)thiourea) (OPPT)** with 85% yield. The relevant scheme is given in the Figure S13. <sup>1</sup>H NMR (500 MHz, DMSO d<sub>6</sub>) 14.14 (s, 2H), 10.84 (s, 2H), 7.78 (d, *J* = 8.8 Hz, 4H), 7.73 (t, *J* = 7.9 Hz, 2H), 7.09-7.07 (m, 6H), 6.97 (d, *J* = 7.4 Hz, 2H), 2.48 (s, 6H); <sup>13</sup>C NMR (125 MHz, DMSO d<sub>6</sub>) δ 178.45, 154.87, 153.58, 140.11, 134.88, 125.76, 119.06, 117.76, 110.23, 54.38, 23.92. HRMS (ESI): calcd. For C<sub>26</sub>H<sub>24</sub>N<sub>6</sub>OS<sub>2</sub> [M+H]<sup>+</sup> 500.1453 found to be 501.1526.

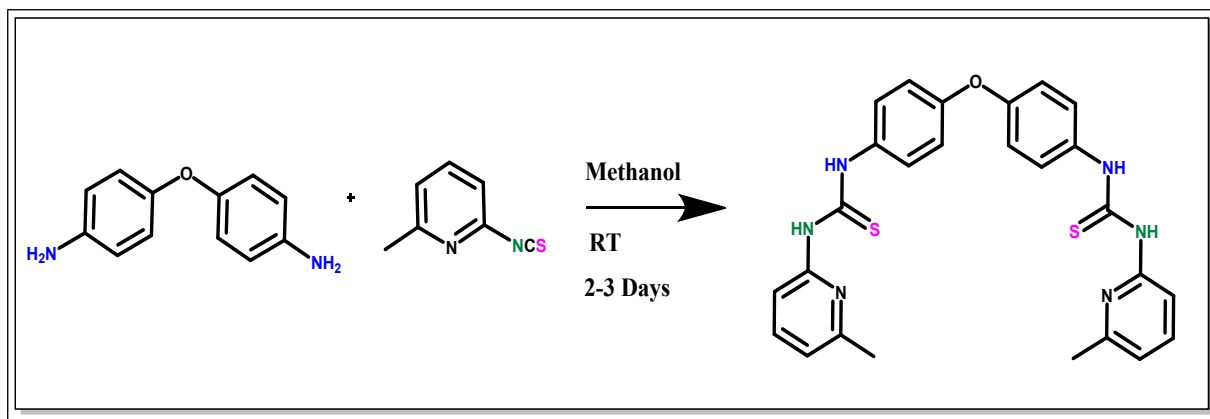

Figure S13. Scheme for the synthesis of organic additive-4 (OPPT)

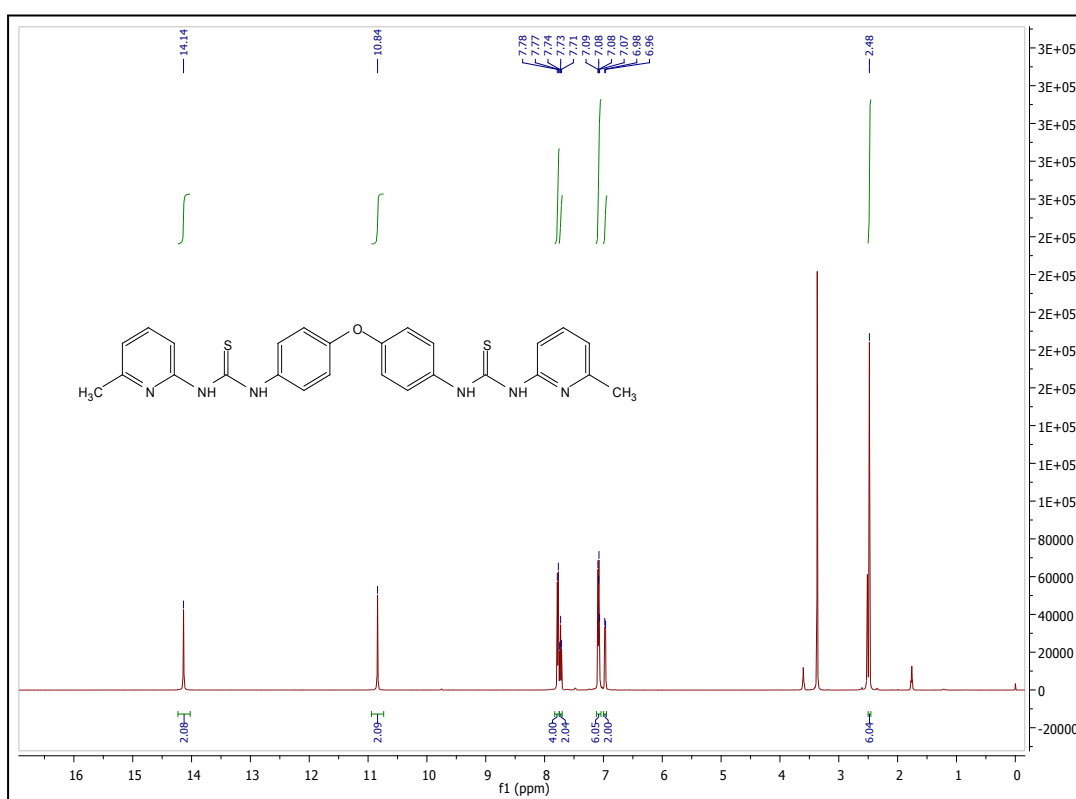

Figure S14.  $^1\text{H}$  NMR spectrum of OPPT

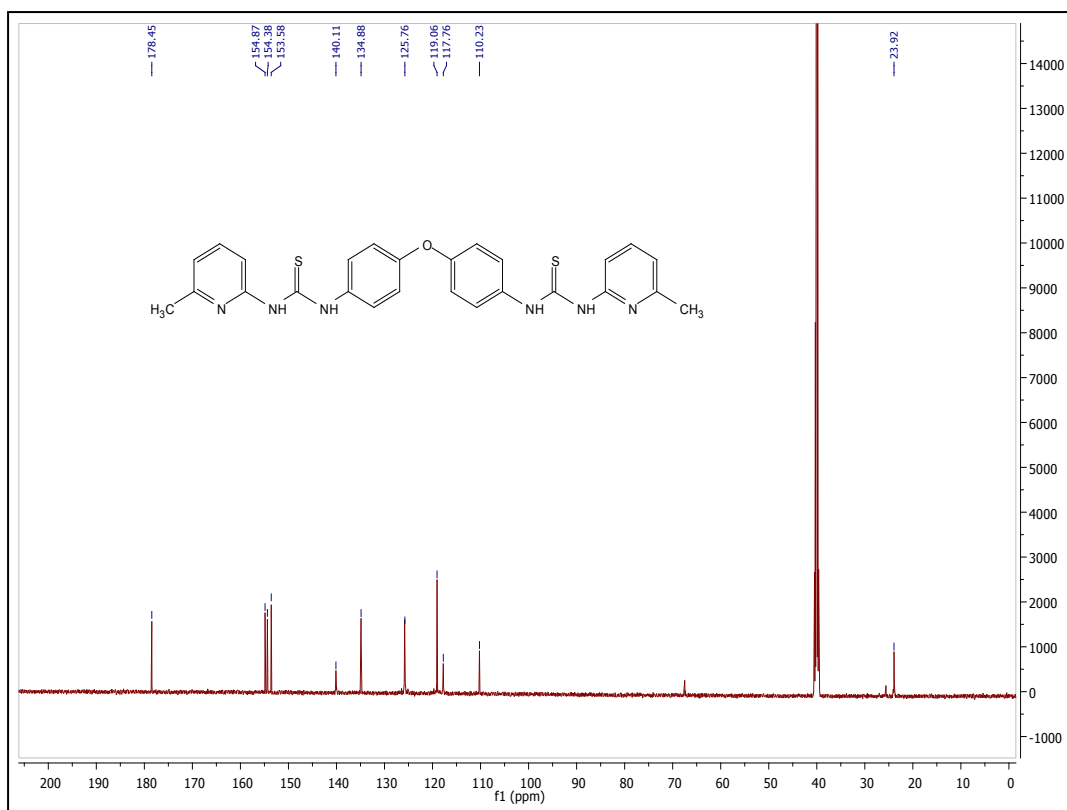

Figure S15. <sup>13</sup>C NMR spectrum of OPPT

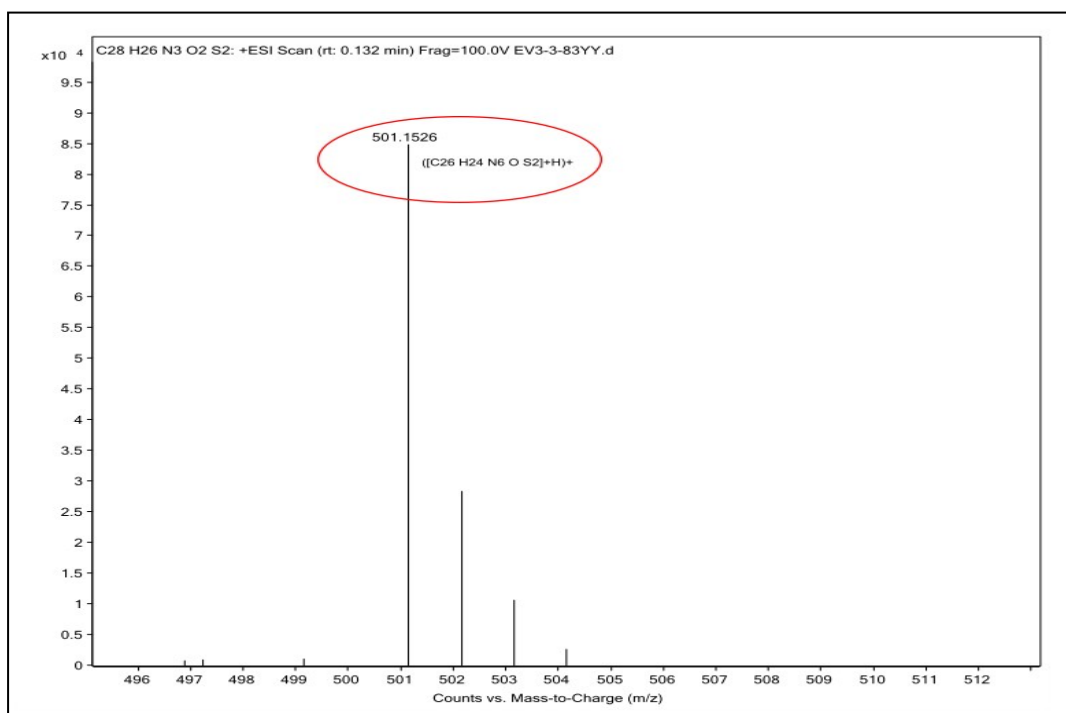

**Figure S16. HRMS spectrum of OPPT**

**Table S1: Statistical analysis of the efficiency of the fabricated DSSC with gel polymer electrolyte system (Device-1)**

| S. No              | Gel polymer electrolyte system | $J_{sc}$ (mA cm <sup>-2</sup> ) | $V_{oc}$ (mV) | FF   | $\eta$ % |
|--------------------|--------------------------------|---------------------------------|---------------|------|----------|
| 1                  | Device-1                       | 10.4                            | 755           | 0.51 | 4        |
| 2                  | Device-1                       | 10.5                            | 746           | 0.51 | 3.99     |
| 3                  | Device-1                       | 10.3                            | 756           | 0.51 | 3.97     |
| Average(Mean)      |                                | 10.4                            | 752.3333      | 0.51 | 3.986667 |
| Standard Deviation |                                | 0.08167                         | 4.4969        | 0    | 0.0123   |

**Table S2: Statistical analysis of the efficiency of the fabricated DSSC with gel polymer electrolyte system (Device-2)**

| S.No               | Gel polymer electrolyte system | $J_{sc}$ (mA cm <sup>-2</sup> ) | $V_{oc}$ (mV) | FF   | $\eta$ % |
|--------------------|--------------------------------|---------------------------------|---------------|------|----------|
| 1                  | Device-2                       | 13.6                            | 785           | 0.52 | 5.55     |
| 2                  | Device-2                       | 13.5                            | 787           | 0.52 | 5.52     |
| 3                  | Device-2                       | 13.7                            | 778           | 0.52 | 5.54     |
| Average(Mean)      |                                | 13.6                            | 783.3333      | 0.52 | 5.536667 |
| Standard Deviation |                                | 0.08167                         | 3.8584        | 0    | 0.0123   |

**Table S3: Statistical analysis of the efficiency of the fabricated DSSC with gel polymer electrolyte system (Device-3)**

| S.No               | Gel polymer electrolyte system | $J_{sc}$ (mA cm <sup>-2</sup> ) | $V_{oc}$ (mV) | FF   | $\eta$ % |
|--------------------|--------------------------------|---------------------------------|---------------|------|----------|
| 1                  | Device-3                       | 11.1                            | 765           | 0.51 | 4.33     |
| 2                  | Device-3                       | 11.2                            | 758           | 0.51 | 4.32     |
| 3                  | Device-3                       | 11.3                            | 752           | 0.51 | 4.33     |
| Average(Mean)      |                                | 11.2                            | 758.3333      | 0.51 | 4.326667 |
| Standard Deviation |                                | 0.08167                         | 5.3124        | 0    | 0.00471  |

**Table S4: Statistical analysis of the efficiency of the fabricated DSSC with gel polymer electrolyte system (Device-4)**

| S.No               | Gel polymer electrolyte system | $J_{sc}$ (mA cm <sup>-2</sup> ) | $V_{oc}$ (mV) | FF   | $\eta$ % |
|--------------------|--------------------------------|---------------------------------|---------------|------|----------|
| 1                  | Device-4                       | 12.2                            | 775           | 0.52 | 4.91     |
| 2                  | Device-4                       | 12.1                            | 776           | 0.52 | 4.88     |
| 3                  | Device-4                       | 12.1                            | 773           | 0.52 | 4.86     |
| Average(Mean)      |                                | 12.13333                        | 774.6667      | 0.52 | 4.883333 |
| Standard Deviation |                                | 0.04711                         | 1.2471        | 0    | 0.0649   |

**Table S5: Statistical analysis of the efficiency of the fabricated DSSC with gel polymer electrolyte system (Device-5)**

| S.No               | Gel polymer electrolyte system | $J_{sc}$ (mA cm <sup>-2</sup> ) | $V_{oc}$ (mV) | FF   | $\eta$ % |
|--------------------|--------------------------------|---------------------------------|---------------|------|----------|
| 1                  | Device-5                       | 14                              | 790           | 0.52 | 5.75     |
| 2                  | Device-5                       | 14.1                            | 784           | 0.52 | 5.74     |
| 3                  | Device-5                       | 14.2                            | 777           | 0.52 | 5.73     |
| Average(Mean)      |                                | 14.1                            | 783.6667      | 0.52 | 5.74     |
| Standard Deviation |                                | 0.08167                         | 5.3124        | 0    | 0.00816  |

**Table S6: Statistical analysis of the efficiency of the fabricated DSSC with gel polymer electrolyte system (Device-6)**

| S.No               | Gel polymer electrolyte system | $J_{sc}$ (mA cm <sup>-2</sup> ) | $V_{oc}$ (mV) | FF   | $\eta$ % |
|--------------------|--------------------------------|---------------------------------|---------------|------|----------|
| 1                  | Device-6                       | 12.6                            | 780           | 0.51 | 5.01     |
| 2                  | Device-6                       | 12.5                            | 781           | 0.51 | 4.98     |
| 3                  | Device-6                       | 12.4                            | 782           | 0.51 | 4.94     |
| Average(Mean)      |                                | 12.5                            | 781           | 0.51 | 4.976667 |
| Standard Deviation |                                | 0.08167                         | 0.8164        | 0    | 0.0283   |

**Table S7: Photovoltaic parameters of the fabricated DSSC using prepared GPE's utilized for the stability test.**

| <b>Device</b> | <b>J<sub>sc</sub> (mA)</b> | <b>V<sub>oc</sub> (mV)</b> | <b>ff</b> | <b>η (%)</b> |
|---------------|----------------------------|----------------------------|-----------|--------------|
| Device-1      | 10.4                       | 755                        | 0.51      | 4 %          |
| Device-2      | 13.6                       | 785                        | 0.52      | 5.55%        |
| Device-3      | 11.1                       | 765                        | 0.51      | 4.33%        |
| Device-4      | 12.2                       | 775                        | 0.52      | 4.91%        |
| Device-5      | 14                         | 790                        | 0.52      | 5.75%        |
| Device-6      | 12.6                       | 780                        | 0.51      | 5.01%        |
